# Supplementary material
Source: PubMed Central journal article supplement (PMC9519906)
Supplement: 41598_2022_18510_MOESM1_ESM.pdf [file 41598_2022_18510_MOESM1_ESM.pdf]

## SUPPLEMENTAL MATERIALS

### **SARS-COV-ATE Risk Assessment Model for Arterial Thromboembolism in COVID-19**

Pin Li, Yi Lee, Qasim Jehangir, Chun-Hui Lin, Geetha Krishnamoorthy, Anupam A. Sule, Abdul R. Halabi,  
Kiritkumar Patel, Laila Poisson, Girish B. Nair

#### Table of Contents

|            |                                                                                                                  |
|------------|------------------------------------------------------------------------------------------------------------------|
| Page 2     | Table S1. ICD-10 codes for arterial thromboembolic events                                                        |
| Page 3-7   | Table S2. Categorization of the variables used in model building                                                 |
| Page 8-11  | Table S3A. Comparison of patients in derivation cohort stratified by in-hospital arterial thromboembolism status |
| Page 12-15 | Table S3B. Comparison of patients in validation cohort stratified by in-hospital arterial thromboembolism status |
| Page 16    | Table S4. In-hospital arterial thromboembolism events in the validation and derivation cohorts                   |
| Page 17    | Table S5. Variable selected by LASSO                                                                             |
| Page 18    | Table S7. Risk factors for three categories of arterial thromboembolism                                          |
| Page 19    | Table S7A. Multivariable analysis of risk factors for acute coronary syndrome                                    |
| Page 20    | Table S7B. Multivariable analysis of risk factors for cerebrovascular accident                                   |
| Page 21    | Table S7C. Multivariable analysis of risk factors for other arterial thromboembolic events                       |
| Page 22    | Table S8A. In-hospital usage of anticoagulation and antiplatelet agents in the derivation cohort                 |
| Page 22    | Table S8B. In-hospital usage of anticoagulation and antiplatelet agents in the validation cohort                 |
| Page 23    | Figure S1. Consort Diagram for cohort selection of derivation cohort                                             |

**Table S1. International Classification of Diseases–Tenth Revision codes for arterial thromboembolic events**

| <b>Variables</b>               | <b>ICD-10 Codes</b>        |
|--------------------------------|----------------------------|
| Transient ischemic attack      | G45 I65 I66                |
| Ischemic stroke                | I63                        |
| Myocardial infarction          | I21, I22, I23, I24         |
| Unstable angina                | I20.0                      |
| Intracardiac thrombus          | I51.3                      |
| Mesenteric ischemia            | K55.0, K55.3, K55.8, K55.9 |
| Other arterial thromboembolism | I73.9 I74 I75              |

**Table S2. Categorization of the variables used in model building**

| <b>Variable</b>   | <b>Categorical or Continuous</b>   | <b>Definition</b>                                |
|-------------------|------------------------------------|--------------------------------------------------|
| Age               | Categories (ref: 19-39)            | 19-39                                            |
|                   |                                    | 40-59                                            |
|                   |                                    | 60-79                                            |
|                   |                                    | ≥80                                              |
| Body mass index   | Categories (ref: 18.5-24.9)        | <18.5                                            |
|                   |                                    | 18.5-24.9                                        |
|                   |                                    | 25.0-29.9                                        |
|                   |                                    | ≥30.0                                            |
| Sex               | Categories (ref: Male)             | Male                                             |
|                   |                                    | Female                                           |
| Race/ethnicity    | Categories (ref: African-American) | African-American                                 |
|                   |                                    | Caucasian                                        |
|                   |                                    | Hispanic                                         |
|                   |                                    | Other                                            |
| Vital Signs       |                                    |                                                  |
| Heart rate        | Categories (ref: <100)             | <100: 0                                          |
|                   |                                    | ≥100: 1                                          |
| Respiratory rate  | Categories (ref: <20)              | <20                                              |
|                   |                                    | 20-29                                            |
|                   |                                    | ≥30                                              |
| Oxygen saturation | Categories (ref: Normal)           | Normal: O2 Saturation >94% and no oxygen device  |
|                   |                                    | Low: O2 Saturation ≤94 and any oxygen device use |

|                                       |                             |                                                                                                                                                                                                                                                                                                             |
|---------------------------------------|-----------------------------|-------------------------------------------------------------------------------------------------------------------------------------------------------------------------------------------------------------------------------------------------------------------------------------------------------------|
| Systolic blood pressure               | Categories (ref: Normal)    | Low: <90 mmHg                                                                                                                                                                                                                                                                                               |
|                                       |                             | Normal: 90-119 mmHg                                                                                                                                                                                                                                                                                         |
|                                       |                             | High: 120-159 mmHg                                                                                                                                                                                                                                                                                          |
|                                       |                             | Very High: ≥160 mmHg                                                                                                                                                                                                                                                                                        |
| <b>Comorbidities</b>                  | <b>Categories (ref: No)</b> |                                                                                                                                                                                                                                                                                                             |
| Hypertension                          | Y/N                         |                                                                                                                                                                                                                                                                                                             |
| Diabetes mellitus                     | Y/N                         |                                                                                                                                                                                                                                                                                                             |
| Hyperlipidemia                        | Y/N                         |                                                                                                                                                                                                                                                                                                             |
| Coronary artery disease               | Y/N                         |                                                                                                                                                                                                                                                                                                             |
| Congestive heart failure              | Y/N                         |                                                                                                                                                                                                                                                                                                             |
| Cerebrovascular accident              | Y/N                         | Stroke and transient ischemic attack                                                                                                                                                                                                                                                                        |
| Cancer and hematological malignancies | Y/N                         | Includes solid tumor and hematologic malignancies i.e., leukemia, lymphoma                                                                                                                                                                                                                                  |
| Autoimmune disease                    | Y/N                         | Rheumatoid arthritis, psoriatic arthritis, spondylarthritis, systemic lupus erythematosus, Sjögren's syndrome, scleroderma, polymyalgia rheumatica, mixed connective tissue disease, dermatomyositis, polymyositis, polyarteritis nodosa, vasculitis, lupus, autoimmune hepatitis, other autoimmune disease |
| Liver disease                         | Y/N                         | Cirrhosis, non-alcoholic steatohepatitis, ascites                                                                                                                                                                                                                                                           |
| Interstitial lung disease             | Y/N                         | Pulmonary fibrosis                                                                                                                                                                                                                                                                                          |
| Chronic obstructive pulmonary disease | Y/N                         | Chronic bronchitis, emphysema                                                                                                                                                                                                                                                                               |
| Atrial fibrillation                   | Y/N                         |                                                                                                                                                                                                                                                                                                             |

|                                    |                          |                                            |
|------------------------------------|--------------------------|--------------------------------------------|
| Deep vein thrombosis               | Y/N                      |                                            |
| Pulmonary embolism                 | Y/N                      |                                            |
| Thyroid disease                    | Y/N                      | Hypothyroidism, hyperthyroidism            |
| Social history                     |                          |                                            |
| History of smoking                 | Y/N                      |                                            |
| History of alcohol use             | Y/N                      |                                            |
| <b>Labs on presentation</b>        |                          |                                            |
| Leukocyte (K/UL)                   | Categories (ref: Normal) | Low: <3.7                                  |
|                                    |                          | Normal: ≥3.7 and ≤11                       |
|                                    |                          | High: >11                                  |
| Lymphocytes (K/UL)                 | Categories (ref: Normal) | Low: <1                                    |
|                                    |                          | Normal: 1.0-3.5                            |
|                                    |                          | High: >3.5                                 |
| Neutrophils (K/UL)                 | Categories (ref: Normal) | Low: <1.5<br>Normal: 1.5 - 10<br>High: >10 |
| Neutrophil-Lymphocyte ratio        | Categories (ref: Normal) | Low: <0.8                                  |
|                                    |                          | Normal: 0.8-3.49                           |
|                                    |                          | Mild: 3.5-8.99                             |
|                                    |                          | Moderate: 9-17.99                          |
|                                    |                          | Severe: >18                                |
| B-type natriuretic peptide (pg/mL) | Categories (ref: Normal) | Normal: 0-100                              |
|                                    |                          | High: >100                                 |
| C-reactive protein (mg/dL)         | Categories (ref: Normal) | Normal: 0-0.5                              |

|                                  |                          |                  |
|----------------------------------|--------------------------|------------------|
|                                  |                          | High: >0.5       |
| D-dimer (ng/mL)                  | Categories (ref: Normal) | Normal: 0-500    |
|                                  |                          | High: >500-2000  |
|                                  |                          | Very high: >2000 |
| Ferritin (ng/mL)                 | Categories (ref: Normal) | Normal: ≤336     |
|                                  |                          | High: >336       |
| Lactate dehydrogenase (U/L)      | Categories (ref: Normal) | Normal ≤192      |
|                                  |                          | High: >192       |
| Blood urea nitrogen (mg/dL)      | Categories (ref: Normal) | Normal: ≤23      |
|                                  |                          | High: >23        |
| Creatinine (mg/dL)               | Categories (ref: Normal) | Normal: ≤1.40    |
|                                  |                          | High: >1.40      |
| Total Bilirubin (mg/dL)          | Categories (ref: Normal) | Normal: 0.0-1.6  |
|                                  |                          | High: >1.6       |
| Aspartate aminotransferase (U/L) | Categories (ref: Normal) | Low: <15         |
|                                  |                          | Normal: 15-41    |
|                                  |                          | High: >41        |
| Alanine aminotransferase (U/L)   | Categories (ref: Normal) | Low: <10         |
|                                  |                          | Normal: 10-63    |
|                                  |                          | High: >63        |
| Alkaline Phosphatase (U/L)       | Categories (ref: Normal) | Low: <38         |
|                                  |                          | Normal: 38-126   |

|                              |                          |                                          |
|------------------------------|--------------------------|------------------------------------------|
|                              |                          | High: >126                               |
| Albumin (mg/dL)              | Categories (ref: Normal) | Low: <3.5                                |
|                              |                          | Normal: ≥3.5                             |
| Troponin-I (ng/mL)           | Categories (ref: Normal) | Normal: 0-0.03 NG/ML                     |
|                              |                          | High: 0.04-0.09 NG/ML                    |
|                              |                          | Higher: >0.09 NG/ML                      |
| Creatine phosphokinase (U/L) | Categories (ref: Normal) | Normal: ≤280 in males or ≤155 in females |
|                              |                          | High: >280 in males or >155 in females   |
| Interleukin 6 (pg/mL)        | Categories (ref: Normal) | Normal: 0-5                              |
|                              |                          | High: >5                                 |
| Lactate (mmol/L)             | Categories (ref: Normal) | Normal: ≤2.2                             |
|                              |                          | High: >2.2                               |
| Procalcitonin (ng/mL)        | Categories (ref: Normal) | Normal: 0-0.5                            |
|                              |                          | High: >0.5                               |
| Potassium (mEq/L)            | Categories (ref: Normal) | Hypokalemia: <3.5                        |
|                              |                          | Normal: 3.5-5                            |
|                              |                          | Hyperkalemia: >5                         |
| Platelet count (K/uL)        | Categories (ref: Normal) | Low: <140                                |
|                              |                          | Normal: 140-440                          |
|                              |                          | High: >440                               |
| Magnesium (mg/dL)            | Categories (ref: Normal) | Hypomagnesemia: <1.8                     |
|                              |                          | Normal: 1.8-2.5                          |
|                              |                          | Hypermagnesemia: >2.5                    |

**Table S3A. Comparison of patients in derivation cohort stratified by in-hospital arterial thromboembolism status.**

| Variable                             | Total Population (N = 3526) | Arterial thromboembolism (N = 547) | No Arterial thromboembolism (N = 2979) | p-value |
|--------------------------------------|-----------------------------|------------------------------------|----------------------------------------|---------|
| Sex                                  |                             |                                    |                                        | 0.002   |
| Male                                 | 1774 (50.3)                 | 309 (56.5)                         | 1465 (49.2)                            |         |
| Female                               | 1752 (49.7)                 | 238 (43.5)                         | 1514 (50.8)                            |         |
| Age (years)                          |                             |                                    |                                        | <.001   |
| 18-39                                | 230 (6.5)                   | 6 (1.1)                            | 224 (7.5)                              |         |
| 40-59                                | 808 (22.9)                  | 57 (10.4)                          | 751 (25.2)                             |         |
| 60-79                                | 1598 (45.3)                 | 261 (47.7)                         | 1337 (44.9)                            |         |
| ≥80                                  | 890 (25.2)                  | 223 (40.8)                         | 667 (22.4)                             |         |
| Race/ethnicity                       |                             |                                    |                                        | 0.001   |
| Hispanic                             | 55 (1.6)                    | 5 (0.9)                            | 50 (1.7)                               |         |
| Other                                | 251 (7.1)                   | 30 (5.5)                           | 221 (7.4)                              |         |
| Caucasian                            | 2031 (57.6)                 | 358 (65.4)                         | 1673 (56.2)                            |         |
| African-American                     | 1189 (33.7)                 | 154 (28.2)                         | 1035 (34.7)                            |         |
| Body mass index (kg/m <sup>2</sup> ) |                             |                                    |                                        | <.001   |
| <18.5                                | 80 (2.3)                    | 23 (4.2)                           | 57 (1.9)                               |         |
| 18.5-24.9                            | 668 (18.9)                  | 145 (26.5)                         | 523 (17.6)                             |         |
| 25.0-29.9                            | 1065 (30.2)                 | 170 (31.1)                         | 895 (30.0)                             |         |
| ≥30.0                                | 1713 (48.6)                 | 209 (38.2)                         | 1504 (50.5)                            |         |
| Heart Rate (bpm)                     |                             |                                    |                                        | 0.203   |
| <100                                 | 2180 (61.8)                 | 352 (64.4)                         | 1828 (61.4)                            |         |
| ≥100                                 | 1346 (38.2)                 | 195 (35.6)                         | 1151 (38.6)                            |         |
| Respiratory Rate (bpm)               |                             |                                    |                                        | 0.003   |
| <20                                  | 1645 (46.7)                 | 231 (42.2)                         | 1414 (47.5)                            |         |
| 20-29                                | 1570 (44.5)                 | 249 (45.5)                         | 1321 (44.3)                            |         |
| ≥30                                  | 311 (8.8)                   | 67 (12.2)                          | 244 (8.2)                              |         |
| Oxygen                               |                             |                                    |                                        | 0.009   |
| O2Sat > 94% and no oxygen device     | 1524 (43.2)                 | 208 (38.0)                         | 1316 (44.2)                            |         |
| O2Sat ≤94% or any oxygen device      | 2002 (56.8)                 | 339 (62.0)                         | 1663 (55.8)                            |         |
| Systolic blood pressure (mmHg)       |                             |                                    |                                        | <.001   |
| <90                                  | 940 (26.7)                  | 131 (23.9)                         | 809 (27.2)                             |         |
| 90-119                               | 101 (2.9)                   | 28 (5.1)                           | 73 (2.5)                               |         |
| 120-159                              | 1978 (56.1)                 | 281 (51.4)                         | 1697 (57.0)                            |         |
| ≥160                                 | 507 (14.4)                  | 107 (19.6)                         | 400 (13.4)                             |         |
| <b>Comorbidities</b>                 |                             |                                    |                                        |         |
| Hypertension                         | 2734 (77.5)                 | 455 (83.2)                         | 2279 (76.5)                            | 0.001   |
| Diabetes mellitus                    | 1446 (41.0)                 | 234 (42.8)                         | 1212 (40.7)                            | 0.385   |
| Hyperlipidemia                       | 1677 (47.6)                 | 284 (51.9)                         | 1393 (46.8)                            | 0.03    |
| Coronary artery disease              | 708 (20.1)                  | 187 (34.2)                         | 521 (17.5)                             | <.001   |



|                                           |             |            |             |       |
|-------------------------------------------|-------------|------------|-------------|-------|
| Congestive heart failure                  | 457 (13.0)  | 118 (21.6) | 339 (11.4)  | <.001 |
| Cerebrovascular accident                  | 452 (12.8)  | 122 (22.3) | 330 (11.1)  | <.001 |
| Solid cancer and hematological malignancy | 609 (17.2)  | 115 (21.0) | 494 (16.6)  | 0.014 |
| Autoimmune Disease                        | 212 (6.0)   | 36 (6.6)   | 176 (5.9)   | 0.609 |
| Liver disease*                            | 29 (0.8)    | 5 (0.9)    | 24 (0.8)    | 0.796 |
| Interstitial lung disease*                | 19 (0.5)    | 3 (0.5)    | 16 (0.5)    | 1     |
| Atrial fibrillation                       | 383 (10.9)  | 95 (17.4)  | 288 (9.7)   | <.001 |
| Deep vein thrombosis                      | 286 (8.1)   | 56 (10.2)  | 230 (7.7)   | 0.058 |
| Pulmonary embolism                        | 491 (13.9)  | 81 (14.8)  | 410 (13.8)  | 0.561 |
| Chronic kidney disease                    | 491 (13.9)  | 101 (18.5) | 390 (13.1)  | 0.001 |
| End-stage renal disease                   | 152 (4.3)   | 31 (5.7)   | 121 (4.1)   | 0.113 |
| <b>Social history</b>                     |             |            |             |       |
| Smoker                                    | 271 (7.7)   | 53 (9.7)   | 218 (7.3)   | 0.068 |
| Alcohol Use                               | 61 (1.7)    | 12 (2.2)   | 49 (1.6)    | 0.467 |
| <b>Presenting laboratory values</b>       |             |            |             |       |
| Leukocytes                                |             |            |             | <.001 |
| Normal                                    | 2664 (75.6) | 381 (69.7) | 2283 (76.6) |       |
| Low                                       | 313 (8.9)   | 39 (7.1)   | 274 (9.2)   |       |
| High                                      | 549 (15.6)  | 127 (23.2) | 422 (14.2)  |       |
| Lymphocytes                               |             |            |             | 0.033 |
| Normal                                    | 1375 (39.0) | 207 (37.8) | 1168 (39.2) |       |
| Low                                       | 2107 (59.8) | 327 (59.8) | 1780 (59.8) |       |
| High                                      | 44 (1.2)    | 13 (2.4)   | 31 (1.0)    |       |
| Neutrophils                               |             |            |             | <.001 |
| Normal                                    | 3023 (85.7) | 437 (79.9) | 2586 (86.8) |       |
| Low                                       | 77 (2.2)    | 8 (1.5)    | 69 (2.3)    |       |
| High                                      | 426 (12.1)  | 102 (18.6) | 324 (10.9)  |       |
| Neutrophil/Lymphocyte ratio               |             |            |             | <.001 |
| Normal                                    | 876 (24.8)  | 113 (20.7) | 763 (25.6)  |       |
| Low                                       | 34 (1.0)    | 6 (1.1)    | 28 (0.9)    |       |
| Mild                                      | 1561 (44.3) | 216 (39.5) | 1345 (45.1) |       |
| Moderate                                  | 730 (20.7)  | 139 (25.4) | 591 (19.8)  |       |
| Severe                                    | 325 (9.2)   | 73 (13.3)  | 252 (8.5)   |       |
| B-type natriuretic peptide                |             |            |             | <.001 |
| Normal                                    | 2208 (62.6) | 194 (35.5) | 2014 (67.6) |       |
| High                                      | 1318 (37.4) | 353 (64.5) | 965 (32.4)  |       |
| C-reactive protein                        |             |            |             | 0.028 |
| Normal                                    | 81 (2.3)    | 5 (0.9)    | 76 (2.6)    |       |
| High                                      | 3445 (97.7) | 542 (99.1) | 2903 (97.4) |       |
| D-dimer                                   |             |            |             | <.001 |
| Normal                                    | 1482 (42.0) | 165 (30.2) | 1317 (44.2) |       |
| High                                      | 1691 (48.0) | 309 (56.5) | 1382 (46.4) |       |
| Very High                                 | 353 (10.0)  | 73 (13.3)  | 280 (9.4)   |       |
| Ferritin                                  |             |            |             | 0.973 |

|                        |             |            |             |       |
|------------------------|-------------|------------|-------------|-------|
| Normal                 | 1501 (42.6) | 232 (42.4) | 1269 (42.6) |       |
| High                   | 2025 (57.4) | 315 (57.6) | 1710 (57.4) |       |
| Lactate dehydrogenase  |             |            |             | <.001 |
| Normal                 | 701 (19.9)  | 76 (13.9)  | 625 (21.0)  |       |
| High                   | 2825 (80.1) | 471 (86.1) | 2354 (79.0) |       |
| Blood urea nitrogen    |             |            |             | <.001 |
| Normal                 | 2093 (59.4) | 234 (42.8) | 1859 (62.4) |       |
| High                   | 1433 (40.6) | 313 (57.2) | 1120 (37.6) |       |
| Creatinine             |             |            |             | <.001 |
| Normal                 | 2494 (70.7) | 308 (56.3) | 2186 (73.4) |       |
| High                   | 1032 (29.3) | 239 (43.7) | 793 (26.6)  |       |
| Total bilirubin        |             |            |             | 0.351 |
| Normal                 | 3363 (95.4) | 517 (94.5) | 2846 (95.5) |       |
| High                   | 163 (4.6)   | 30 (5.5)   | 133 (4.5)   |       |
| Aspartate transaminase |             |            |             | <.001 |
| Normal                 | 1544 (43.8) | 179 (32.7) | 1365 (45.8) |       |
| Low                    | 73 (2.1)    | 11 (2.0)   | 62 (2.1)    |       |
| High                   | 1909 (54.1) | 357 (65.3) | 1552 (52.1) |       |
| Alanine transaminase   |             |            |             | 0.036 |
| Normal                 | 2345 (66.5) | 338 (61.8) | 2007 (67.4) |       |
| Low                    | 307 (8.7)   | 52 (9.5)   | 255 (8.6)   |       |
| High                   | 874 (24.8)  | 157 (28.7) | 717 (24.1)  |       |
| Alkaline Phosphatase   |             |            |             | 0.067 |
| Normal                 | 3105 (88.1) | 468 (85.6) | 2637 (88.5) |       |
| Low                    | 179 (5.1)   | 29 (5.3)   | 150 (5.0)   |       |
| High                   | 242 (6.9)   | 50 (9.1)   | 192 (6.4)   |       |
| Albumin                |             |            |             | <.001 |
| Normal                 | 512 (14.5)  | 48 (8.8)   | 464 (15.6)  |       |
| Low                    | 2347 (66.6) | 438 (80.1) | 1909 (64.1) |       |
| High                   | 667 (18.9)  | 61 (11.2)  | 606 (20.3)  |       |
| Troponin-I             |             |            |             | <.001 |
| Normal                 | 2088 (59.2) | 210 (38.4) | 1878 (63.0) |       |
| High                   | 924 (26.2)  | 162 (29.6) | 762 (25.6)  |       |
| Higher                 | 514 (14.6)  | 175 (32.0) | 339 (11.4)  |       |
| Creatine phosphokinase |             |            |             | 0.031 |
| Normal                 | 2029 (57.5) | 291 (53.2) | 1738 (58.3) |       |
| Low                    | 303 (8.6)   | 44 (8.0)   | 259 (8.7)   |       |
| High                   | 1194 (33.9) | 212 (38.8) | 982 (33.0)  |       |
| Interleukin-6          |             |            |             | <.001 |
| Normal                 | 386 (10.9)  | 35 (6.4)   | 351 (11.8)  |       |
| High                   | 3140 (89.1) | 512 (93.6) | 2628 (88.2) |       |
| Lactate                |             |            |             | <.001 |
| Normal                 | 2764 (78.4) | 392 (71.7) | 2372 (79.6) |       |
| High                   | 762 (21.6)  | 155 (28.3) | 607 (20.4)  |       |
| Procalcitonin          |             |            |             | <.001 |
| Normal                 | 2405 (68.2) | 320 (58.5) | 2085 (70.0) |       |

|                 |             |            |             |       |
|-----------------|-------------|------------|-------------|-------|
| High            | 1121 (31.8) | 227 (41.5) | 894 (30.0)  |       |
| Potassium       |             |            |             | 0.009 |
| Normal          | 2627 (74.5) | 388 (70.9) | 2239 (75.2) |       |
| Hypokalemia     | 661 (18.7)  | 106 (19.4) | 555 (18.6)  |       |
| Hyperkalemia    | 238 (6.7)   | 53 (9.7)   | 185 (6.2)   |       |
| Platelet Count  |             |            |             | 0.055 |
| Normal          | 2788 (79.1) | 416 (76.1) | 2372 (79.6) |       |
| Low             | 611 (17.3)  | 114 (20.8) | 497 (16.7)  |       |
| High            | 127 (3.6)   | 17 (3.1)   | 110 (3.7)   |       |
| Magnesium       |             |            |             | 0.001 |
| Normal          | 2591 (73.5) | 369 (67.5) | 2222 (74.6) |       |
| Hypomagnesemia  | 750 (21.3)  | 135 (24.7) | 615 (20.6)  |       |
| Hypermagnesemia | 185 (5.2)   | 43 (7.9)   | 142 (4.8)   |       |

\*Fisher-exact tests were used for these variables; chi-square tests were used otherwise

**Table S3B. Comparison of patients in external validation cohort stratified by in-hospital arterial thromboembolism status.**

| Variable                             | Total Population (N = 2392) | Arterial thromboembolism (N = 285) | No Arterial thromboembolism (N = 2107) | p-value |
|--------------------------------------|-----------------------------|------------------------------------|----------------------------------------|---------|
| Sex                                  |                             |                                    |                                        | <.001   |
| Male                                 | 1134 (47.4)                 | 168 (58.9)                         | 966 (45.8)                             |         |
| Female                               | 1258 (52.6)                 | 117 (41.1)                         | 1141 (54.2)                            |         |
| Age (years)                          |                             |                                    |                                        | <.001   |
| 18-39                                | 358 (15.0)                  | 14 (4.9)                           | 353 (16.3)                             |         |
| 40-59                                | 700 (29.3)                  | 41 (14.4)                          | 679 (31.3)                             |         |
| 60-79                                | 941 (39.3)                  | 147 (51.6)                         | 807 (37.7)                             |         |
| ≥80                                  | 393 (16.4)                  | 83 (29.1)                          | 316 (14.7)                             |         |
| Race/ethnicity                       |                             |                                    |                                        | 0.108   |
| Hispanic                             | 61 (2.6)                    | 5 (1.8)                            | 56 (2.7)                               |         |
| Other                                | 175 (7.3)                   | 15 (5.3)                           | 160 (7.6)                              |         |
| Caucasian                            | 1402 (58.6)                 | 185 (64.9)                         | 1217 (57.8)                            |         |
| African-American                     | 754 (31.5)                  | 80 (28.1)                          | 674 (32.0)                             |         |
| Body mass index (kg/m <sup>2</sup> ) |                             |                                    |                                        | 0.085   |
| <18.5                                | 64 (2.7)                    | 12 (4.2)                           | 52 (2.5)                               |         |
| 18.5-24.9                            | 434 (18.1)                  | 55 (19.3)                          | 379 (18.0)                             |         |
| 25.0-29.9                            | 668 (27.9)                  | 89 (31.2)                          | 579 (27.5)                             |         |
| ≥30.0                                | 1226 (51.3)                 | 129 (45.3)                         | 1097 (52.1)                            |         |
| Heart Rate (bpm)                     |                             |                                    |                                        | 0.423   |
| <100                                 | 1446 (60.5)                 | 179 (62.8)                         | 1267 (60.1)                            |         |
| ≥100                                 | 946 (39.5)                  | 106 (37.2)                         | 840 (39.9)                             |         |
| Respiratory Rate (bpm)               |                             |                                    |                                        | 0.001   |
| <20                                  | 1315 (55.0)                 | 134 (47.0)                         | 1181 (56.1)                            |         |
| 20-29                                | 962 (40.2)                  | 127 (44.6)                         | 835 (39.6)                             |         |
| ≥30                                  | 115 (4.8)                   | 24 (8.4)                           | 91 (4.3)                               |         |
| Oxygen                               |                             |                                    |                                        | 0.002   |
| O2Sat > 94% and no oxygen device     | 1172 (49.0)                 | 114 (40.0)                         | 1058 (50.2)                            |         |
| O2Sat ≤94% or any oxygen device      | 1220 (51.0)                 | 171 (60.0)                         | 1049 (49.8)                            |         |
| Systolic blood pressure (mmHg)       |                             |                                    |                                        | <.001   |
| <90                                  | 640 (26.8)                  | 71 (24.9)                          | 569 (27.0)                             |         |
| 90-119                               | 51 (2.1)                    | 11 (3.9)                           | 40 (1.9)                               |         |
| 120-159                              | 1370 (57.3)                 | 143 (50.2)                         | 1227 (58.2)                            |         |
| ≥160                                 | 331 (13.8)                  | 60 (21.1)                          | 271 (12.9)                             |         |
| <b>Comorbidities</b>                 |                             |                                    |                                        |         |
| Hypertension                         | 1647 (68.9)                 | 230 (80.7)                         | 1417 (67.3)                            | <.001   |
| Diabetes mellitus                    | 946 (39.5)                  | 126 (44.2)                         | 820 (38.9)                             | 0.099   |
| Hyperlipidemia                       | 999 (41.8)                  | 168 (58.9)                         | 831 (39.4)                             | <.001   |

|                                           |             |            |             |       |
|-------------------------------------------|-------------|------------|-------------|-------|
| Coronary artery disease                   | 373 (15.6)  | 103 (36.1) | 270 (12.8)  | <.001 |
| Congestive heart failure                  | 340 (14.2)  | 71 (24.9)  | 269 (12.8)  | <.001 |
| Cerebrovascular accident                  | 293 (12.2)  | 62 (21.8)  | 231 (11.0)  | <.001 |
| Solid cancer and hematological malignancy | 336 (14.0)  | 57 (20.0)  | 279 (13.2)  | 0.003 |
| Autoimmune Disease                        | 119 (5.0)   | 10 (3.5)   | 109 (5.2)   | 0.286 |
| Liver disease*                            | 38 (1.6)    | 4 (1.4)    | 34 (1.6)    | 1     |
| Interstitial lung disease                 | 301 (12.6)  | 45 (15.8)  | 256 (12.1)  | 0.1   |
| Atrial fibrillation                       | 292 (12.2)  | 56 (19.6)  | 236 (11.2)  | <.001 |
| Deep vein thrombosis                      | 175 (7.3)   | 25 (8.8)   | 150 (7.1)   | 0376  |
| Pulmonary embolism                        | 335 (14.0)  | 51 (17.9)  | 284 (13.5)  | 0.054 |
| Chronic kidney disease                    | 319 (13.3)  | 69 (24.2)  | 250 (11.9)  | <.001 |
| End-stage renal disease                   | 132 (5.5)   | 33 (11.6)  | 99 (4.7)    | <.001 |
| <b>Social history</b>                     |             |            |             |       |
| Smoker                                    | 262 (11.0)  | 21 (7.4)   | 241 (11.4)  | 0.05  |
| Alcohol Use                               | 86 (3.6)    | 10 (3.5)   | 76 (3.6)    | 1     |
| <b>Presenting laboratory values</b>       |             |            |             |       |
| Leukocytes                                |             |            |             | <.001 |
| Normal                                    | 1802 (75.4) | 184 (64.6) | 1618 (76.8) |       |
| Low                                       | 241 (10.1)  | 29 (10.2)  | 212 (10.1)  |       |
| High                                      | 349 (14.6)  | 72 (25.3)  | 277 (13.1)  |       |
| Lymphocytes                               |             |            |             | 0.292 |
| Normal                                    | 1093 (45.7) | 119 (41.8) | 974 (46.2)  |       |
| Low                                       | 1257 (52.6) | 162 (56.8) | 1095 (52.0) |       |
| High                                      | 42 (1.8)    | 4 (1.4)    | 38 (1.8)    |       |
| Neutrophils                               |             |            |             | <.001 |
| Normal                                    | 1999 (83.6) | 196 (68.8) | 1803 (85.6) |       |
| Low                                       | 174 (7.3)   | 51 (17.9)  | 123 (5.8)   |       |
| High                                      | 219 (9.2)   | 38 (13.3)  | 181 (8.6)   |       |
| Neutrophil/Lymphocyte ratio               |             |            |             | <.001 |
| Normal                                    | 833 (34.8)  | 87 (30.5)  | 746 (35.4)  |       |
| Low                                       | 106 (4.4)   | 33 (11.6)  | 73 (3.5)    |       |
| Mild                                      | 910 (38.0)  | 96 (33.7)  | 814 (38.6)  |       |
| Moderate                                  | 352 (14.7)  | 34 (11.9)  | 318 (15.1)  |       |
| Severe                                    | 191 (8.0)   | 35 (12.3)  | 156 (7.4)   |       |
| B-type natriuretic peptide                |             |            |             | <.001 |
| Normal                                    | 1264 (52.8) | 85 (29.8)  | 1179 (56.0) |       |
| High                                      | 1128 (47.2) | 200 (70.2) | 928 (44.0)  |       |
| C-reactive protein                        |             |            |             | 0.941 |
| Normal                                    | 78 (3.3)    | 10 (3.5)   | 68 (3.2)    |       |
| High                                      | 2314 (96.7) | 275 (96.5) | 2039 (96.8) |       |
| D-dimer                                   |             |            |             | <.001 |
| Normal                                    | 1117 (46.7) | 81 (28.4)  | 1036 (49.2) |       |
| High                                      | 1044 (43.6) | 150 (52.6) | 894 (42.4)  |       |
| Very High                                 | 231 (9.7)   | 54 (18.9)  | 177 (8.4)   |       |

|                        |             |            |              |       |
|------------------------|-------------|------------|--------------|-------|
| Ferritin               |             |            |              | 0.414 |
| Normal                 | 1040 (43.5) | 117 (41.1) | 923 (43.8)   |       |
| High                   | 1352 (56.5) | 168 (58.9) | 11844 (56.2) |       |
| Lactate dehydrogenase  |             |            |              | 0.003 |
| Normal                 | 436 (18.2)  | 33 (11.6)  | 403 (19.1)   |       |
| High                   | 1956 (81.8) | 252 (88.4) | 1704 (80.9)  |       |
| Blood urea nitrogen    |             |            |              | <.001 |
| Normal                 | 1620 (67.7) | 129 (45.3) | 1491 (70.8)  |       |
| High                   | 772 (32.3)  | 156 (54.7) | 616 (29.2)   |       |
| Creatinine             |             |            |              | <.001 |
| Normal                 | 1852 (77.4) | 177 (62.1) | 1675 (79.5)  |       |
| High                   | 540 (22.6)  | 108 (37.9) | 432 (20.5)   |       |
| Total bilirubin        |             |            |              | 0.101 |
| Normal                 | 2254 (94.2) | 262 (91.9) | 1992 (94.5)  |       |
| High                   | 138 (5.8)   | 23 (8.1)   | 115 (5.5)    |       |
| Aspartate transaminase |             |            |              | 0.05  |
| Normal                 | 1333 (55.7) | 141 (49.5) | 1192 (56.6)  |       |
| Low                    | 77 (3.2)    | 13 (4.6)   | 64 (3.0)     |       |
| High                   | 982 (41.1)  | 131 (46.0) | 851 (40.4)   |       |
| Alanine transaminase   |             |            |              | 0.423 |
| Normal                 | 1889 (79.0) | 224 (78.6) | 1665 (79.0)  |       |
| Low                    | 146 (6.1)   | 22 (7.7)   | 124 (5.9)    |       |
| High                   | 357 (14.9)  | 39 (13.7)  | 318 (15.1)   |       |
| Alkaline Phosphatase   |             |            |              | 0.455 |
| Normal                 | 2078 (86.9) | 245 (86.0) | 1833 (87.0)  |       |
| Low                    | 103 (4.3)   | 10 (3.5)   | 93 (4.4)     |       |
| High                   | 211 (8.8)   | 30 (10.5)  | 181 (8.6)    |       |
| Albumin                |             |            |              | <.001 |
| Normal                 | 331 (13.8)  | 32 (11.2)  | 299 (14.2)   |       |
| Low                    | 1482 (62.0) | 214 (75.1) | 1268 (60.2)  |       |
| High                   | 579 (24.2)  | 39 (13.7)  | 540 (25.6)   |       |
| Troponin-I             |             |            |              | <.001 |
| Normal                 | 588 (24.6)  | 24 (8.4)   | 564 (26.8)   |       |
| High                   | 273 (11.4)  | 9 (3.2)    | 264 (12.5)   |       |
| Higher                 | 1531 (64.0) | 252 (88.4) | 1279 (60.7)  |       |
| Creatine phosphokinase |             |            |              | 0.005 |
| Normal                 | 1344 (56.2) | 135 (47.4) | 1209 (57.4)  |       |
| Low                    | 218 (9.1)   | 28 (9.8)   | 190 (9.0)    |       |
| High                   | 830 (34.7)  | 122 (42.8) | 708 (33.6)   |       |
| Interleukin-6          |             |            |              | 0.001 |
| Normal                 | 159 (6.6)   | 5 (1.8)    | 154 (7.3)    |       |
| High                   | 2233 (93.4) | 280 (98.2) | 1953 (92.7)  |       |
| Lactate                |             |            |              | <.001 |
| Normal                 | 1737 (72.6) | 176 (61.8) | 1561 (74.1)  |       |
| High                   | 655 (27.4)  | 109 (38.2) | 546 (25.9)   |       |
| Procalcitonin          |             |            |              | <.001 |

|                 |             |            |             |       |
|-----------------|-------------|------------|-------------|-------|
| Normal          | 1407 (58.8) | 118 (41.4) | 1289 (61.2) |       |
| High            | 985 (41.2)  | 167 (58.6) | 818 (38.8)  |       |
| Potassium       |             |            |             | 0.001 |
| Normal          | 1803 (75.4) | 204 (71.6) | 1599 (75.9) |       |
| Hypokalemia     | 465 (19.4)  | 53 (18.6)  | 412 (19.6)  |       |
| Hyperkalemia    | 124 (5.2)   | 28 (9.8)   | 96 (4.6)    |       |
| Platelet Count  |             |            |             | 0.627 |
| Normal          | 1906 (79.7) | 228 (80.0) | 1678 (79.6) |       |
| Low             | 413 (17.3)  | 46 (16.1)  | 367 (17.4)  |       |
| High            | 73 (3.1)    | 11 (3.9)   | 62 (2.9)    |       |
| Magnesium       |             |            |             | <.001 |
| Normal          | 1527 (63.8) | 114 (40.0) | 1413 (67.1) |       |
| Hypomagnesemia  | 443 (18.5)  | 38 (13.3)  | 405 (19.2)  |       |
| Hypermagnesemia | 422 (17.6)  | 133 (46.7) | 289 (13.7)  |       |

\*Fisher-exact tests were used for these variables; chi-square tests were used otherwise

**Table S4. In-hospital arterial thromboembolism events in the validation and derivation cohorts**

| <b>Events</b>                                         | <b>Training cohort (n=3526)</b> | <b>Validation cohort (n=2392)</b> |
|-------------------------------------------------------|---------------------------------|-----------------------------------|
| Transient Ischemic Attack                             | 39 (1.1%)                       | 24 (1.0%)                         |
| Ischemic Stroke                                       | 44 (1.3%)                       | 34 (1.4%)                         |
| Myocardial Infarction                                 | 418 (11.9%)                     | 207 (8.7%)                        |
| Unstable Angina                                       | 1 (0.03%)                       | 1 (0.04%)                         |
| Intracardiac Thrombus                                 | 7 (0.2%)                        | 6 (0.3%)                          |
| Mesenteric ischemia                                   | 2 (0.06%)                       | 2 (0.08%)                         |
| Other Arterial Thromboembolism                        | 88 (2.5%)                       | 51 (2.1%)                         |
| Patients with multiple arterial thromboembolic events | 51 (1.4%)*                      | 37 (1.5%)**                       |
| <b>Any arterial thromboembolism</b>                   | <b>547 (15.5%)</b>              | <b>285 (11.9%)</b>                |

\*50 patients had 2 ATE events, and 1 patient had 3 ATE events.

\*\*34 patients had 2 ATE events, 3 patients had 3 ATE events.



**Table S5. Variable selected by LASSO**

|                          |                                 |                          |
|--------------------------|---------------------------------|--------------------------|
| Gender                   | Atrial fibrillation             | Aspartate transaminase   |
| Age                      | History of deep vein thrombosis | Alanine transaminase     |
| Race/ethnicity           | Chronic kidney disease          | Alkaline phosphatase     |
| Body mass index          | End-stage renal disease         | Troponin-I               |
| Heart rate               | Smoker                          | Creatinine phosphokinase |
| Respiratory rate         | Leukocytes                      | Interleukin 6            |
| Systolic blood pressure  | Neutrophil/Lymphocyte ratio     | Lactate                  |
| Hyperlipidemia           | B-type natriuretic peptide      | Procalcitonin            |
| Coronary artery disease  | Ferritin                        | Potassium                |
| Congestive heart failure | Lactate dehydrogenase           | Magnesium                |
| Cerebrovascular accident | Creatinine                      |                          |

**Table S6. Risk factors for three categories of arterial thromboembolism**

| <b>Acute coronary syndrome</b>          | <b>Cerebrovascular accident</b>         | <b>Other arterial thromboembolic events</b> |
|-----------------------------------------|-----------------------------------------|---------------------------------------------|
| Age 60+ years                           | Respiratory rate $\geq 30$ bpm          | Diabetes mellitus                           |
| Systolic blood pressure $\geq 160$ mmHg | Systolic blood pressure $\geq 160$ mmHg | History of cerebrovascular accident         |
| Coronary artery disease                 | History of cerebrovascular accident     | Coronary artery disease                     |
| B-type natriuretic peptide $>100$ pg/mL | B-type natriuretic peptide $>100$ pg/mL | Smoking                                     |
| Aspartate aminotransferase $>41$ U/L    | Ferritin $>336$ ng/mL                   | Leukocytes $>11$ K/uL                       |
| Troponin-I $0.04-0.09$ ng/mL            | Alanine aminotransferase $>63$ U/L      | Magnesium $<1.8$ mg/dL                      |
| Troponin-I $>0.09$ ng/mL                | Albumin $\geq 3.9$ mg/dL                |                                             |
| Interleukin-6 $>5$ pg/mL                | Procalcitonin $>0.5$ ng/mL              |                                             |
|                                         | Platelet count $<140$ K/UL              |                                             |

**Table S7A. Multivariable analysis of risk factors for acute coronary syndrome**

| <b>Risk factor</b>                    | <b>Log odds</b> | <b>95% CI</b> | <b>p-value</b> |
|---------------------------------------|-----------------|---------------|----------------|
| Age 60-79                             | 1.08            | 0.03 - 2.13   | 0.044          |
| Age >= 80                             | 1.30            | 0.22 - 2.37   | 0.018          |
| Systolic blood pressure<br>>=160 mmHg | 0.42            | 0.01 - 0.84   | 0.047          |
| Coronary artery disease               | 0.48            | 0.16 - 0.79   | 0.003          |
| BNP >100 pg/mL                        | 1.09            | 0.77 - 1.42   | <0.001         |
| AST >41 U/L                           | 0.69            | 0.35 - 1.03   | <0.001         |
| Troponin-I 0.04-0.09 ng/mL            | 0.60            | 0.25 - 0.95   | 0.001          |
| Troponin-I >0.09 ng/mL                | 1.90            | 1.55 - 2.25   | <0.001         |
| Interleukin-6 >5 pg/mL                | 0.92            | 0.18 - 1.67   | 0.015          |

**Table S7B. Multivariable analysis of risk factors for cerebrovascular accident**

| <b>Risk factor</b>                      | <b>Log odds</b> | <b>95% CI</b> | <b>p-value</b> |
|-----------------------------------------|-----------------|---------------|----------------|
| Respiratory rate $\geq 30$ bpm          | -1.29           | -2.50 - -0.08 | 0.037          |
| Systolic blood pressure $\geq 160$ mmHg | 0.86            | 0.14 - 1.58   | 0.019          |
| History of cerebrovascular accident     | 1.17            | 0.67 - 1.66   | $<0.001$       |
| B-type natriuretic peptide $>100$ pg/mL | 0.90            | 0.39 - 1.41   | 0.001          |
| Ferritin $>336$ ng/mL                   | -0.74           | -1.23 - -0.25 | 0.003          |
| Alanine aminotransferase $>63$ U/L      | 0.77            | 0.24 - 1.31   | 0.004          |
| Albumin $\geq 3.9$ mg/dL                | -0.95           | -1.83 - -0.06 | 0.036          |
| Procalcitonin $>0.5$ ng/mL              | 0.67            | 0.19 - 1.14   | 0.006          |
| Platelet count $<140$ K/UL              | -0.93           | -1.7 - -0.17  | 0.017          |

**Table S7C. Multivariable analysis of risk factors for other arterial thromboembolic events**

| <b>Risk factor</b>                  | <b>Log odds</b> | <b>95% CI</b> | <b>p-value</b> |
|-------------------------------------|-----------------|---------------|----------------|
| Diabetes mellitus                   | -1.48           | -2.03 - -0.93 | <0.001         |
| History of cerebrovascular accident | 0.57            | 0.07 - 1.07   | 0.026          |
| Coronary artery disease             | 0.70            | 0.24 - 1.16   | 0.003          |
| Smoking                             | 0.68            | 0.01 - 1.35   | 0.047          |
| Leukocytes >11 K/uL                 | 0.73            | 0.21 - 1.24   | 0.006          |
| Magnesium <1.8 mg/dL                | 0.62            | 0.13 - 1.11   | 0.012          |

**Table S8A. In-hospital usage of anticoagulation and antiplatelet agents in the derivation cohort**

| <b>Drug</b>                  | <b>ATE (N: 547)</b> | <b>Non-ATE (N: 2979)</b> | <b>p-value</b> |
|------------------------------|---------------------|--------------------------|----------------|
| Prophylactic anticoagulation | 480 (87.8%)         | 2723 (91.4%)             | 0.008          |
| Therapeutic anticoagulation  | 124 (22.7%)         | 430 (11.4%)              | <.001          |
| Antiplatelet therapy         | 319 (58.3%)         | 951 (31.9%)              | <.001          |
| Aspirin                      | 302 (55.2%)         | 900 (30.2%)              | <.001          |
| P2Y12 inhibitor              | 75 (13.7%)          | 163 (5.5%)               | <.001          |
| Clopidogrel                  | 70 (12.8%)          | 154 (5.2%)               | <.001          |
| Prasugrel*                   | 1 (0.2%)            | 3 (0.1%)                 | 0.491          |
| Ticagrelor*                  | 7 (1.3%)            | 7 (0.2%)                 | 0.003          |
| Cangrelor*                   | 1 (0.2%)            | 0 (0.0%)                 | 0.155          |

\*Fisher-exact tests were used for these variables; chi-square tests were used otherwise

**Table S8B. In-hospital usage of anticoagulation and antiplatelet agents in the validation cohort**

| <b>Drug</b>                  | <b>ATE (N: 285)</b> | <b>Non-ATE (N: 2107)</b> | <b>p-value</b> |
|------------------------------|---------------------|--------------------------|----------------|
| Prophylactic anticoagulation | 171 (60.0%)         | 1483 (70.4%)             | <.001          |
| Therapeutic anticoagulation  | 117 (40.1%)         | 645 (30.6%)              | <.001          |
| Antiplatelet therapy         | 153 (53.7%)         | 464 (22.0%)              | <.001          |
| Aspirin                      | 146 (51.2%)         | 445 (21.1%)              | <.001          |
| P2Y12 inhibitor              | 44 (13.7%)          | 64 (5.5%)                | <.001          |
| Clopidogrel                  | 35 (12.8%)          | 62 (5.2%)                | <.001          |
| Prasugrel*                   | 1 (0.2%)            | 0 (0.1%)                 | 0.119          |
| Ticagrelor*                  | 12 (1.3%)           | 2 (0.2%)                 | <.001          |
| Cangrelor*                   | 0 (0.0%)            | 0 (0.0%)                 | 1              |

\*Fisher-exact tests were used for these variables; chi-square tests were used otherwise

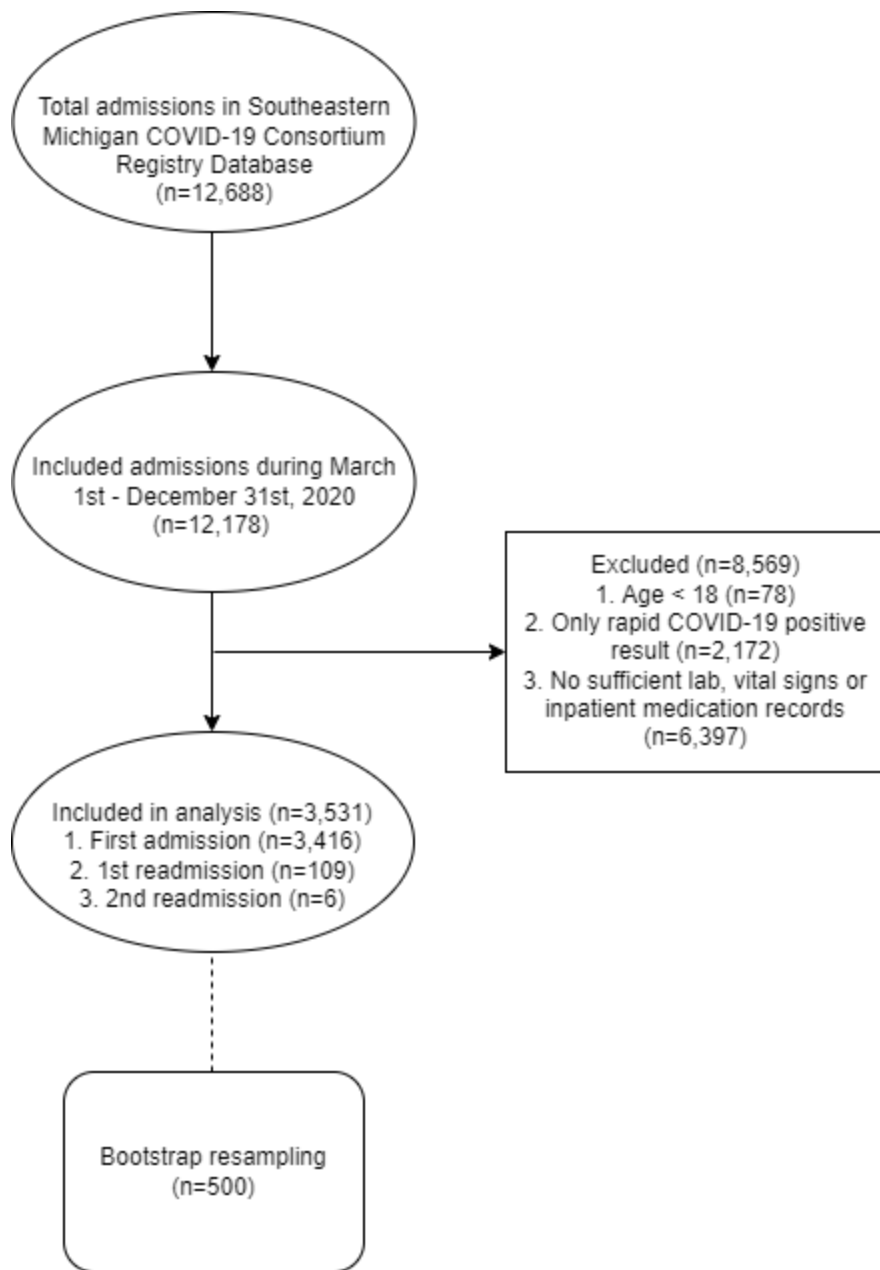

Figure S1. Consort Diagram for cohort selection of derivation cohort and the bootstrapping process.
